# Supplementary material
Source: PubMed Central journal article supplement (PMC2914104)
Supplement: NIHMS206615-supplement-SOM.pdf [file NIHMS206615-supplement-SOM.pdf]

## Cyclin-dependent kinases: a family portrait

by Malumbres et al.

### Supplementary Figures and Table

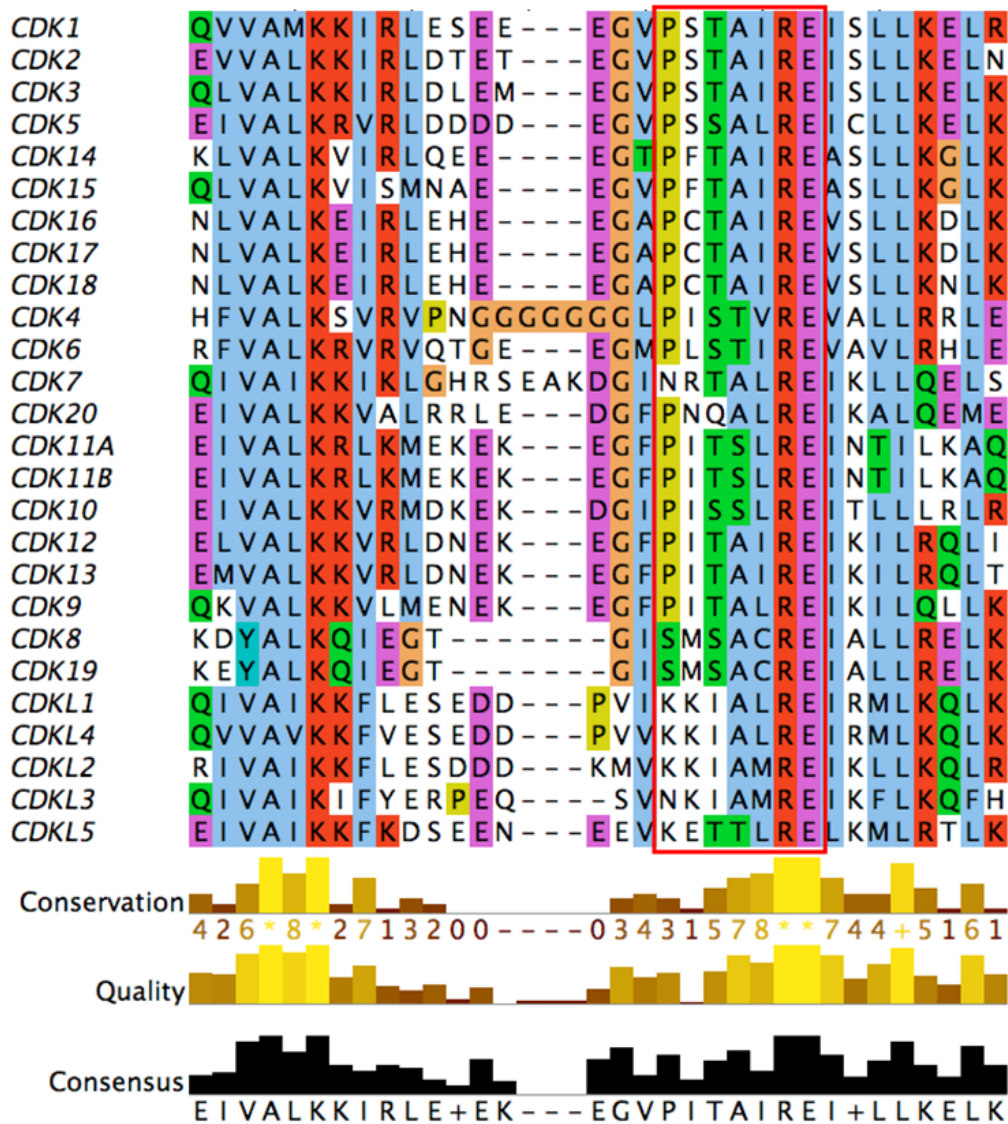

**Figure S1. Predicted Cyclin-binding elements in CDK and CDKL proteins.** Protein sequences were aligned with Clustal2. The predicted Cyclin-binding domain is indicated by a red box.

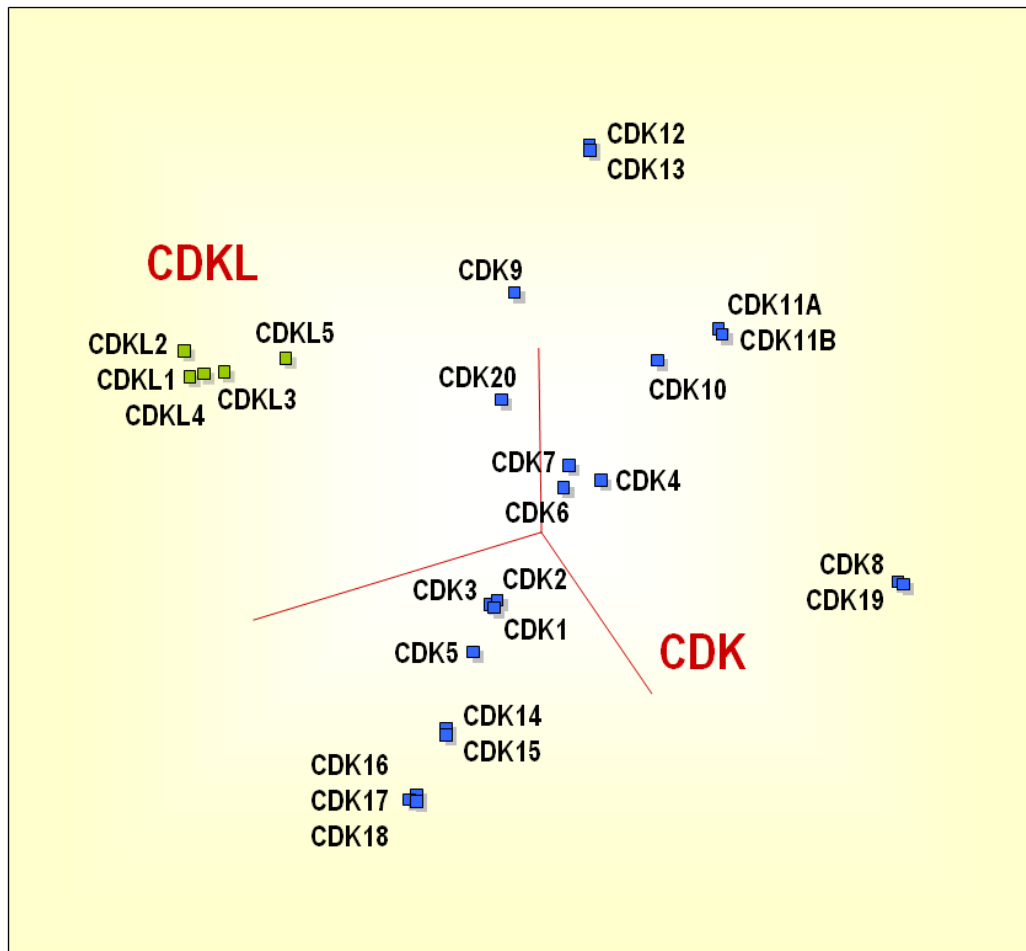

**Figure S2. A family portrait of the CDK and CDKL families.** The kinase domain of these proteins was processed using principal component analysis. The three major components of sequence divergence are indicated by the red lines. This analysis separates the CDKL family (green boxes) from CDK proteins (blue boxes). In addition, it suggests a multidirectional evolution of CDK proteins where CDK1-3 map to the center of the space and different clusters emerge in different directions. Thus, CDK5 and CDK14-CDK18 proteins cluster in one direction with CDK5 being the most conserved member. CDKs that regulate transcription at different levels (either by regulating pRb, RNAPolIII or splicing) cluster in the opposite direction, revealing a wide diversity in their evolutionary trends.

**Table S1.** CDK and CDKL family members\*

| Symbol            | Other Symbols†                          | Cyclin-binding element | Cyclin and Cyclin-like partners                  | Human locus | Hs.aa              | Hs.Ensembl      | Hs. Acc.. | Mm.Acc. | Cellular process                                                                                    | Mutations                               |
|-------------------|-----------------------------------------|------------------------|--------------------------------------------------|-------------|--------------------|-----------------|-----------|---------|-----------------------------------------------------------------------------------------------------|-----------------------------------------|
| <b>CDK family</b> |                                         |                        |                                                  |             |                    |                 |           |         |                                                                                                     |                                         |
| CDK1              | Cdc2                                    | PSTAIRE                | A1, A2, B1, B2, (B3), D- E-                      | 10q21.2     | 297                | ENSG00000170312 | P06493    | P11440  | Cell cycle: mitosis (S-phase)                                                                       | N.D.                                    |
| CDK2              |                                         | PSTAIRE                | A1, A2, B1, B3, D, E1, E2, Cables1, SpdYA, SpdYC | 12q13.2     | 298                | ENSG00000123374 | P24941    | P97377  | Cell cycle: S, G2, meiosis                                                                          | P45L glioblastoma multiforme            |
| CDK3              |                                         | PSTAIRE                | A1, A2, E1, E2, C, Cables1                       | 17q25.1     | 305                | ENSG00000108504 | Q00526    | Q80YP0  | Cell cycle: G1/S unclear                                                                            | S106N glioma                            |
| CDK4              | PSK-J3                                  | PISTVRE                | D1, D2, D3                                       | 12q14.1     | 303                | ENSG00000135446 | P11802    | P30285  | Cell cycle: G1                                                                                      | R24C, R24H, N41S melanoma               |
| CDK5              | TPKII                                   | PSSALRE                | p35, p39 (D-, E and G-type cyclins), Cables1     | 7q36.1      | 292                | ENSG00000164885 | Q00535    | P49615  | Neuron biology; Cell Cycle?                                                                         | N.D.                                    |
| CDK6              | PLSTIRE                                 | PLSTIRE                | D1, D2, D3                                       | 7q21.2      | 326                | ENSG00000105810 | Q00534    | Q64261  | Cell Cycle: G1                                                                                      | P199L melanoma                          |
| CDK7              | CAK, MO15, STK1                         | NRTALRE                | H                                                | 5q13.2      | 346                | ENSG00000134058 | P50613    | Q03147  | CDK activating kinase; transcription                                                                | N.D.                                    |
| CDK8              | K35                                     | SMSACRE                | C, (K)                                           | 13q12.13    | 464                | ENSG00000132964 | P49336    | Q8R3L8  | Transcription                                                                                       | R424C intestine tumor; D189N lung tumor |
| CDK9              | PITALRE, CDC2L4, C-2K                   | PITALRE                | K, T1, T2                                        | 9q34.11     | 372                | ENSG00000136807 | P50750    | Q99J95  | Transcription                                                                                       | N.D.                                    |
| CDK10             | PISSLRE                                 | PISSLRE                |                                                  | 16q24.3     | 360                | ENSG00000185324 | Q15131    | Q3UMM4  | Transcription, Cell Cycle: G2/M                                                                     | N.D.                                    |
| CDK11A            | CDC2L2, CDC2L3, PITSLREB, p58GTA, CDK11 | PITSLRE                | D3 (p58 isoform); L1, L2 (p110 isoform)          | 1p36.33     | 780 (p110 isoform) | ENSG00000008128 | Q9UQ88    | P24788  | Transcription, splicing (p119 isoform); Cell cycle: centriole biology and cytokinesis (p58 isoform) | N.D.                                    |

Supplementary Information to "Cyclin-dependent kinases: a family portrait"

|                    |                                              |         |                                         |         |                    |                 |        |        |                                                                                                     |                                        |
|--------------------|----------------------------------------------|---------|-----------------------------------------|---------|--------------------|-----------------|--------|--------|-----------------------------------------------------------------------------------------------------|----------------------------------------|
| CDK11B             | CDC2L1, PITSLREA, PK58, CLK-1, p58GTA, CDK11 | PITSLRE | D3 (p58 isoform); L1, L2 (p110 isoform) | 1p36.33 | 795 (p110 isoform) | ENSG00000189229 | P21127 |        | Transcription, splicing (p119 isoform); Cell cycle: centriole biology and cytokinesis (p58 isoform) | N.D.                                   |
| CDK12              | CRKRS, CRK7, CD2L7, KIAA0904                 | PITAIRE | L1, L2                                  | 17q12   | 1490               | ENSG00000167258 | Q9NYV4 | Q14AX6 | Transcription: RNA splicing                                                                         | N.D.                                   |
| CDK13              | CDC2L5, CHED, KIAA1791                       | PITAIRE | L1, L2                                  | 7p14.1  | 1512               | ENSG00000065883 | Q14004 | Q69ZA1 | Transcription: RNA splicing, blood cell development, cell cycle?                                    | N.D.                                   |
| CDK14              | PFTK1, PFTAIRE-1, KIAA0834                   | PFTAIRE | D3, Y (J. Chen, personal communication) | 7q21.13 | 469                | ENSG00000058091 | O94921 | O35495 | Meiosis?; neuron biology?                                                                           | M414I ovary carcinoma                  |
| CDK15              | PFTK2, PFTAIRE-2, ALS2CR7                    | PFTAIRE |                                         | 2q33.1  | 384                | ENSG00000138395 | Q96Q40 | Q3V3A1 |                                                                                                     | K42E kidney tumor, E225D breast cancer |
| CDK16              | PCTK1, PCTAIRE-1, CRK5                       | PCTAIRE | p35, Cables1                            | Xp11.3  | 496                | ENSG00000102225 | Q00536 | Q04735 | Meiosis, others?                                                                                    | N.D.                                   |
| CDK17              | PCTK2, PCTAIRE-2                             | PCTAIRE | Cables1                                 | 12q23.1 | 523                | ENSG00000059758 | Q00537 | Q8K0D0 | Neuron biology?                                                                                     | N.D.                                   |
| CDK18              | PCTK3, PCTAIRE-3                             | PCTAIRE | K                                       | 1q32.1  | 472                | ENSG00000117266 | Q07002 | Q04899 |                                                                                                     | N.D.                                   |
| CDK19              | CDC2L6, CDKL8, KIAA1028, CDK11               | SMSACRE | C (see Uniprot database)                | 6q21    | 502                | ENSG00000155111 | Q9BWU1 | Q8BWD8 | Transcription                                                                                       | G175S melanoma                         |
| CDK20              | CCRK, CDCH, CAKp42                           | PNQALRE |                                         | 9q22.1  | 346                | ENSG00000156345 | Q8IZL9 | Q9JHU3 | Cell cycle?                                                                                         | N.D.                                   |
| <b>CDKL family</b> |                                              |         |                                         |         |                    |                 |        |        |                                                                                                     |                                        |
| CDKL1              | p42 KKIALRE                                  | KKIALRE |                                         | 14q22.1 | 357                | ENSG00000100490 | Q00532 | Q8CEQ0 |                                                                                                     | N.D.                                   |
| CDKL2              | p56 KKIAMRE                                  | KKIAMRE |                                         | 4q21.1  | 493                | ENSG00000138769 | Q92772 | Q9QUK0 |                                                                                                     | L98I, R149Q ovary; S474* breast tumors |
| CDKL3              | NKIAMRE                                      | NKIAMRE |                                         | 5q31.1  | 592                | ENSG00000006837 | Q8IVW4 | Q8BLF2 |                                                                                                     | E389* breast tumors                    |
| CDKL4              | KKIALRE                                      | KKIALRE |                                         | 2p22.1  | 315                | ENSG00000205111 | Q5MAI5 | Q3TZA2 |                                                                                                     | N.D.                                   |

---

|       |      |                |         |      |                 |        |        |                |                                                                                                                                                 |
|-------|------|----------------|---------|------|-----------------|--------|--------|----------------|-------------------------------------------------------------------------------------------------------------------------------------------------|
| CDKL5 | STK9 | <b>KETTLRE</b> | Xp22.13 | 1030 | ENSG00000008086 | O76039 | Q3UTQ8 | Neuron biology | A374T melanoma, P574Q ovary tumor; N386H colon cancer; C152F & R175S Rett syndrome; P180L and translocated in X-linked infantile spasm syndrome |
|-------|------|----------------|---------|------|-----------------|--------|--------|----------------|-------------------------------------------------------------------------------------------------------------------------------------------------|

\* Human protein sequences were taken from Uniprot (<http://www.uniprot.org/>). Cancer associated mutations were taken from the COSMIC database (<http://www.sanger.ac.uk/genetics/CGP/cosmic/>). N.D., not detected.

† The previous HGNC Symbol is shown in bold when different from the proposed nomenclature.
